# Supplementary material for: Role of MIRU-VNTR and spoligotyping in assessing the genetic diversity of Mycobacterium tuberculosis in Henan Province, China
Source: PubMed Central journal article supplement (PMC6122615; doi:10.1186/s12879-018-3351-y), 2018-09-03

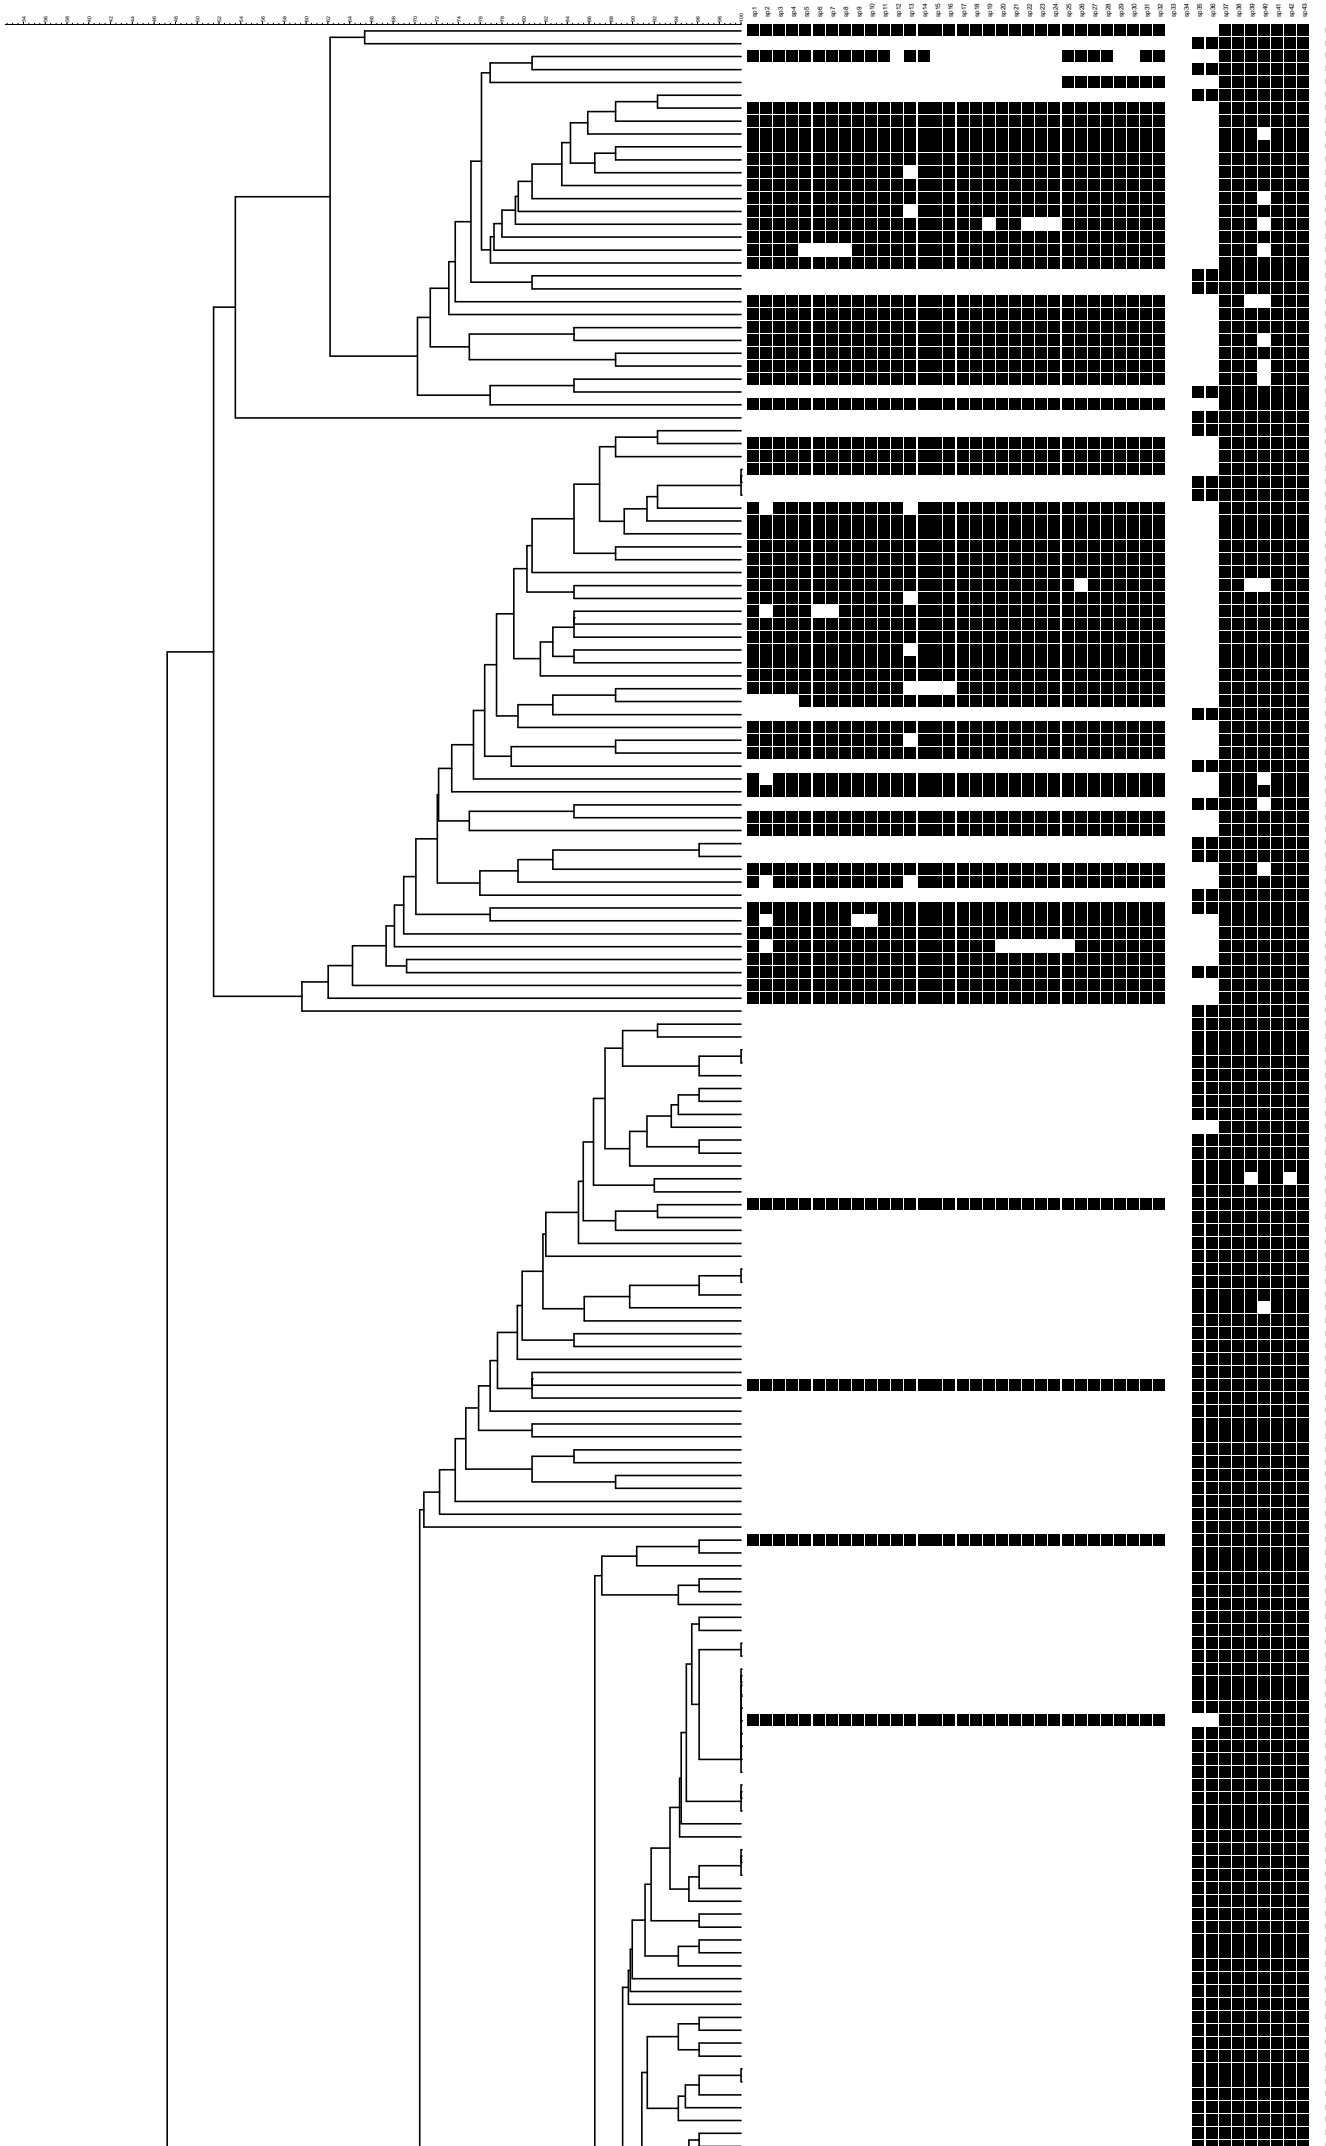

- HN202
- HN203
- HN204
- HN205
- HN206
- HN207
- HN208
- HN209
- HN210
- HN211
- HN212
- HN213
- HN214
- HN215
- HN216
- HN217
- HN218
- HN219
- HN220
- HN221
- HN222
- HN223
- HN224
- HN225
- HN226
- HN227
- HN228
- HN229
- HN230
- HN231
- HN232
- HN233
- HN234
- HN235
- HN236
- HN237
- HN238
- HN239
- HN240
- HN241
- HN242
- HN243
- HN244
- HN245
- HN246
- HN247
- HN248
- HN249
- HN250
- HN251
- HN252
- HN253
- HN254
- HN255
- HN256
- HN257
- HN258
- HN259
- HN260
- HN261
- HN262
- HN263
- HN264
- HN265
- HN266
- HN267
- HN268
- HN269
- HN270
- HN271
- HN272
- HN273
- HN274
- HN275
- HN276
- HN277
- HN278
- HN279
- HN280
- HN281
- HN282
- HN283
- HN284
- HN285
- HN286
- HN287
- HN288
- HN289
- HN290
- HN291
- HN292
- HN293
- HN294
- HN295
- HN296
- HN297
- HN298
- HN299
- HN300
- HN301
- HN302
- HN303
- HN304
- HN305
- HN306
- HN307
- HN308
- HN309
- HN310
- HN311
- HN312
- HN313
- HN314
- HN315
- HN316
- HN317
- HN318
- HN319
- HN320
- HN321
- HN322
- HN323
- HN324
- HN325
- HN326
- HN327
- HN328
- HN329
- HN330
- HN331
- HN332
- HN333
- HN334
- HN335
- HN336
- HN337
- HN338
- HN339
- HN340
- HN341
- HN342
- HN343
- HN344
- HN345
- HN346
- HN347
- HN348
- HN349
- HN350
- HN351
- HN352
- HN353
- HN354
- HN355
- HN356
- HN357
- HN358
- HN359
- HN360
- HN361
- HN362
- HN363
- HN364
- HN365
- HN366
- HN367
- HN368
- HN369
- HN370
- HN371
- HN372
- HN373
- HN374
- HN375
- HN376
- HN377
- HN378
- HN379
- HN380
- HN381
- HN382
- HN383
- HN384
- HN385
- HN386
- HN387
- HN388
- HN389
- HN390
- HN391
- HN392
- HN393
- HN394
- HN395
- HN396
- HN397
- HN398
- HN399
- HN400
- HN401
- HN402
- HN403
- HN404
- HN405
- HN406
- HN407
- HN408
- HN409
- HN410
- HN411
- HN412
- HN413
- HN414
- HN415
- HN416
- HN417
- HN418
- HN419
- HN420
- HN421
- HN422
- HN423
- HN424
- HN425
- HN426
- HN427
- HN428
- HN429
- HN430
- HN431
- HN432
- HN433
- HN434
- HN435
- HN436
- HN437
- HN438
- HN439
- HN440
- HN441
- HN442
- HN443
- HN444
- HN445
- HN446
- HN447
- HN448
- HN449
- HN450
- HN451
- HN452
- HN453
- HN454
- HN455
- HN456
- HN457
- HN458
- HN459
- HN460
- HN461
- HN462
- HN463
- HN464
- HN465
- HN466
- HN467
- HN468
- HN469
- HN470
- HN471
- HN472
- HN473
- HN474
- HN475
- HN476
- HN477
- HN478
- HN479
- HN480
- HN481
- HN482
- HN483
- HN484
- HN485
- HN486
- HN487
- HN488
- HN489
- HN490
- HN491
- HN492
- HN493
- HN494
- HN495
- HN496
- HN497
- HN498
- HN499
- HN500
- HN501
- HN502
- HN503
- HN504
- HN505
- HN506
- HN507
- HN508
- HN509
- HN510
- HN511
- HN512
- HN513
- HN514
- HN515
- HN516
- HN517
- HN518
- HN519
- HN520
- HN521
- HN522
- HN523
- HN524
- HN525

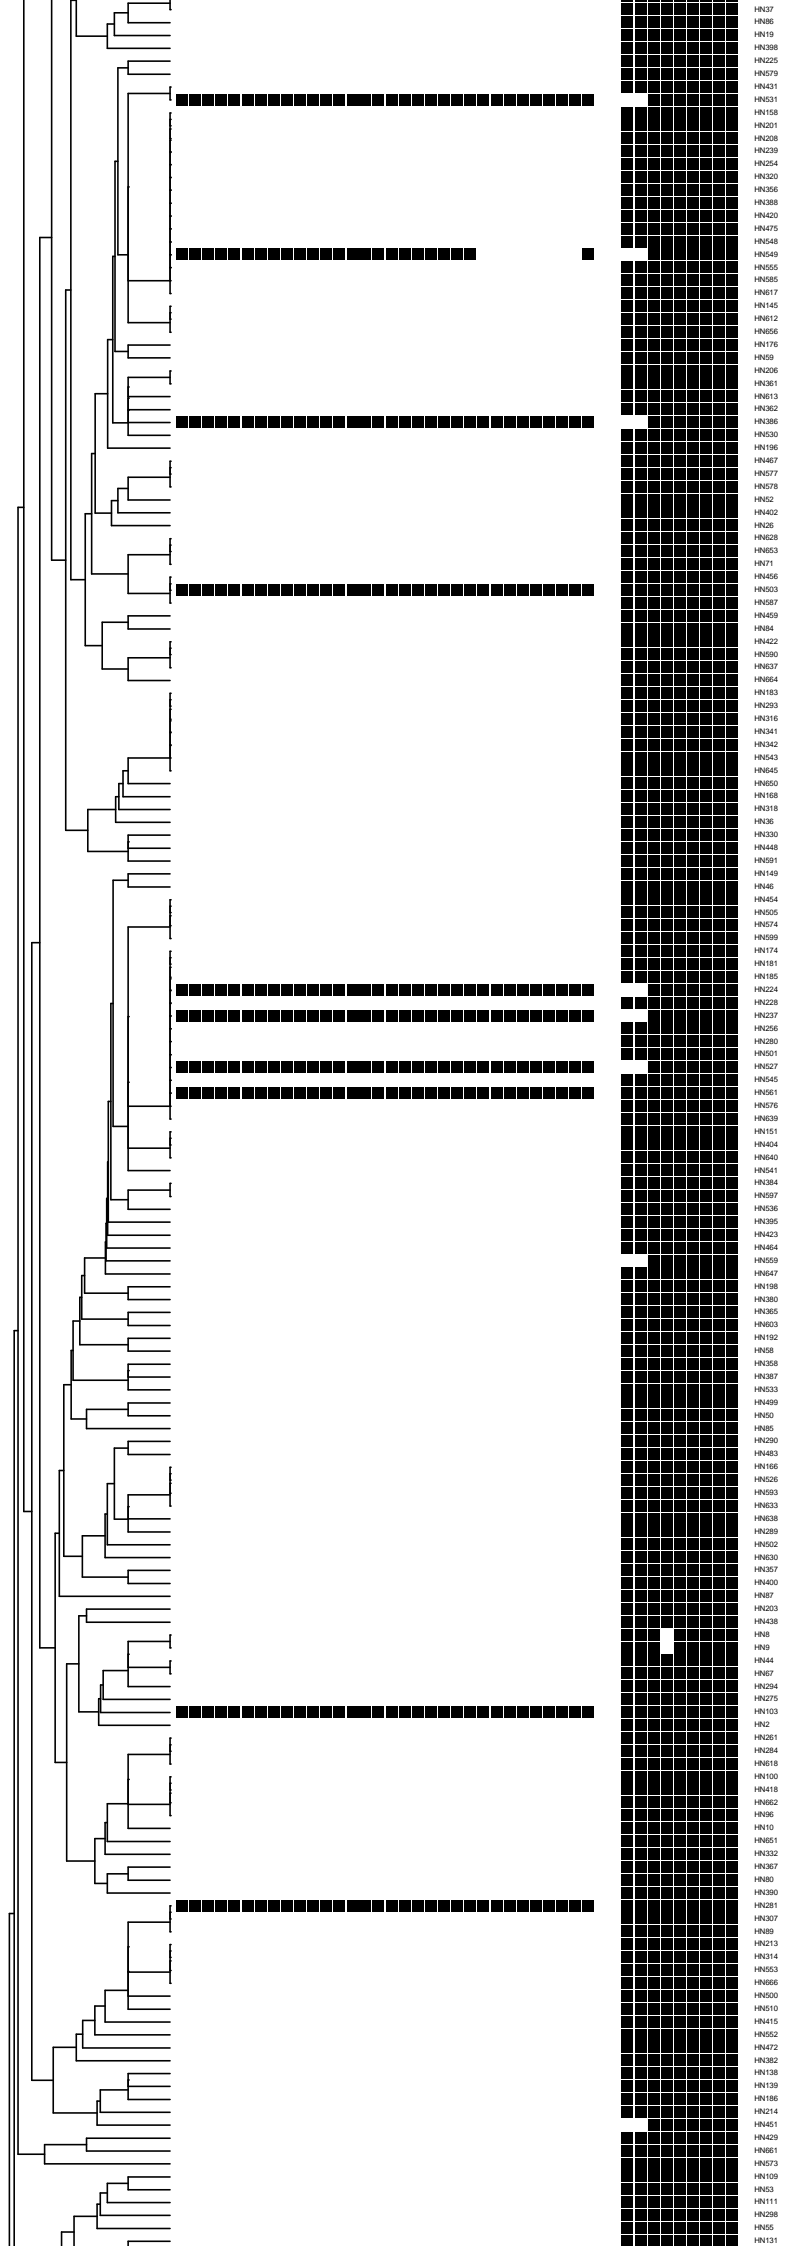

HN37  
HN86  
HN19  
HN308  
HN225  
HN579  
HN431  
HN331  
HN158  
HN201  
HN208  
HN239  
HN254  
HN320  
HN356  
HN388  
HN420  
HN475  
HN545  
HN549  
HN555  
HN585  
HN617  
HN145  
HN612  
HN656  
HN176  
HN59  
HN206  
HN361  
HN613  
HN362  
HN386  
HN530  
HN196  
HN467  
HN577  
HN578  
HN52  
HN422  
HN26  
HN628  
HN653  
HN71  
HN456  
HN503  
HN587  
HN459  
HN4  
HN422  
HN590  
HN637  
HN664  
HN183  
HN323  
HN316  
HN341  
HN342  
HN543  
HN65  
HN650  
HN168  
HN318  
HN36  
HN330  
HN448  
HN591  
HN149  
HN46  
HN454  
HN525  
HN574  
HN599  
HN174  
HN181  
HN185  
HN224  
HN228  
HN237  
HN256  
HN260  
HN501  
HN527  
HN545  
HN591  
HN576  
HN639  
HN151  
HN404  
HN640  
HN541  
HN384  
HN597  
HN536  
HN395  
HN423  
HN464  
HN559  
HN647  
HN198  
HN360  
HN365  
HN603  
HN192  
HN58  
HN358  
HN387  
HN533  
HN499  
HN50  
HN85  
HN290  
HN483  
HN166  
HN526  
HN523  
HN533  
HN538  
HN289  
HN502  
HN630  
HN307  
HN400  
HN87  
HN203  
HN438  
HN8  
HN9  
HN44  
HN67  
HN254  
HN275  
HN103  
HN2  
HN261  
HN264  
HN618  
HN100  
HN418  
HN662  
HN6  
HN10  
HN651  
HN532  
HN367  
HN80  
HN390  
HN281  
HN307  
HN89  
HN213  
HN314  
HN553  
HN666  
HN500  
HN510  
HN415  
HN552  
HN472  
HN382  
HN138  
HN139  
HN186  
HN214  
HN451  
HN429  
HN651  
HN573  
HN109  
HN53  
HN111  
HN208  
HN55  
HN131

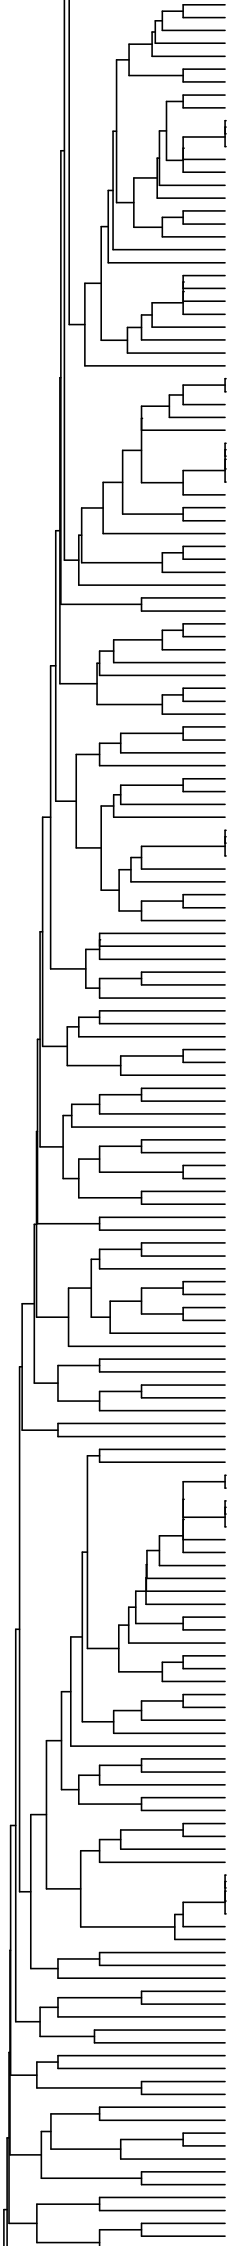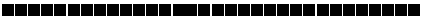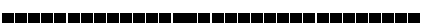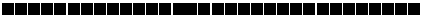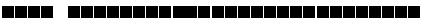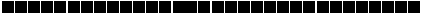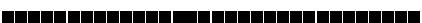

HN109  
HN45  
HN11  
HN298  
HN55  
HN131  
HN551  
HN125  
HN72  
HN104  
HN253  
HN77  
HN105  
HN119  
HN133  
HN79  
HN189  
HN610  
HN259  
HN115  
HN54  
HN114  
HN171  
HN490  
HN598  
HN132  
HN128  
HN113  
HN529  
HN331  
HN538  
HN592  
HN338  
HN525  
HN147  
HN170  
HN444  
HN802  
HN258  
HN283  
HN445  
HN17  
HN205  
HN554  
HN489  
HN229  
HN263  
HN377  
HN141  
HN518  
HN262  
HN88  
HN108  
HN405  
HN409  
HN823  
HN295  
HN223  
HN422  
HN140  
HN421  
HN439  
HN557  
HN107  
HN277  
HN4  
HN474  
HN15  
HN256  
HN257  
HN512  
HN859  
HN370  
HN463  
HN405  
HN146  
HN481  
HN832  
HN300  
HN484  
HN473  
HN21  
HN7  
HN474  
HN583  
HN822  
HN93  
HN508  
HN55  
HN948  
HN215  
HN434  
HN13  
HN42  
HN28  
HN95  
HN195  
HN562  
HN5  
HN426  
HN485  
HN376  
HN383  
HN45  
HN517  
HN157  
HN163  
HN117  
HN437  
HN11  
HN264  
HN373  
HN243  
HN252  
HN25  
HN394  
HN169  
HN416  
HN563  
HN161  
HN567  
HN644  
HN27  
HN441  
HN74  
HN15  
HN494  
HN643  
HN152  
HN91  
HN335  
HN150  
HN175  
HN595  
HN596  
HN658  
HN296  
HN440  
HN190  
HN180  
HN381  
HN458  
HN581  
HN260  
HN136  
HN248  
HN265  
HN354  
HN411  
HN223  
HN362  
HN219  
HN582  
HN350  
HN1  
HN450  
HN78  
HN216  
HN534  
HN102  
HN266  
HN231  
HN271  
HN291  
HN407  
HN465  
HN485  
HN433  
HN532  
HN556  
HN624  
HN92  
HN106  
HN135

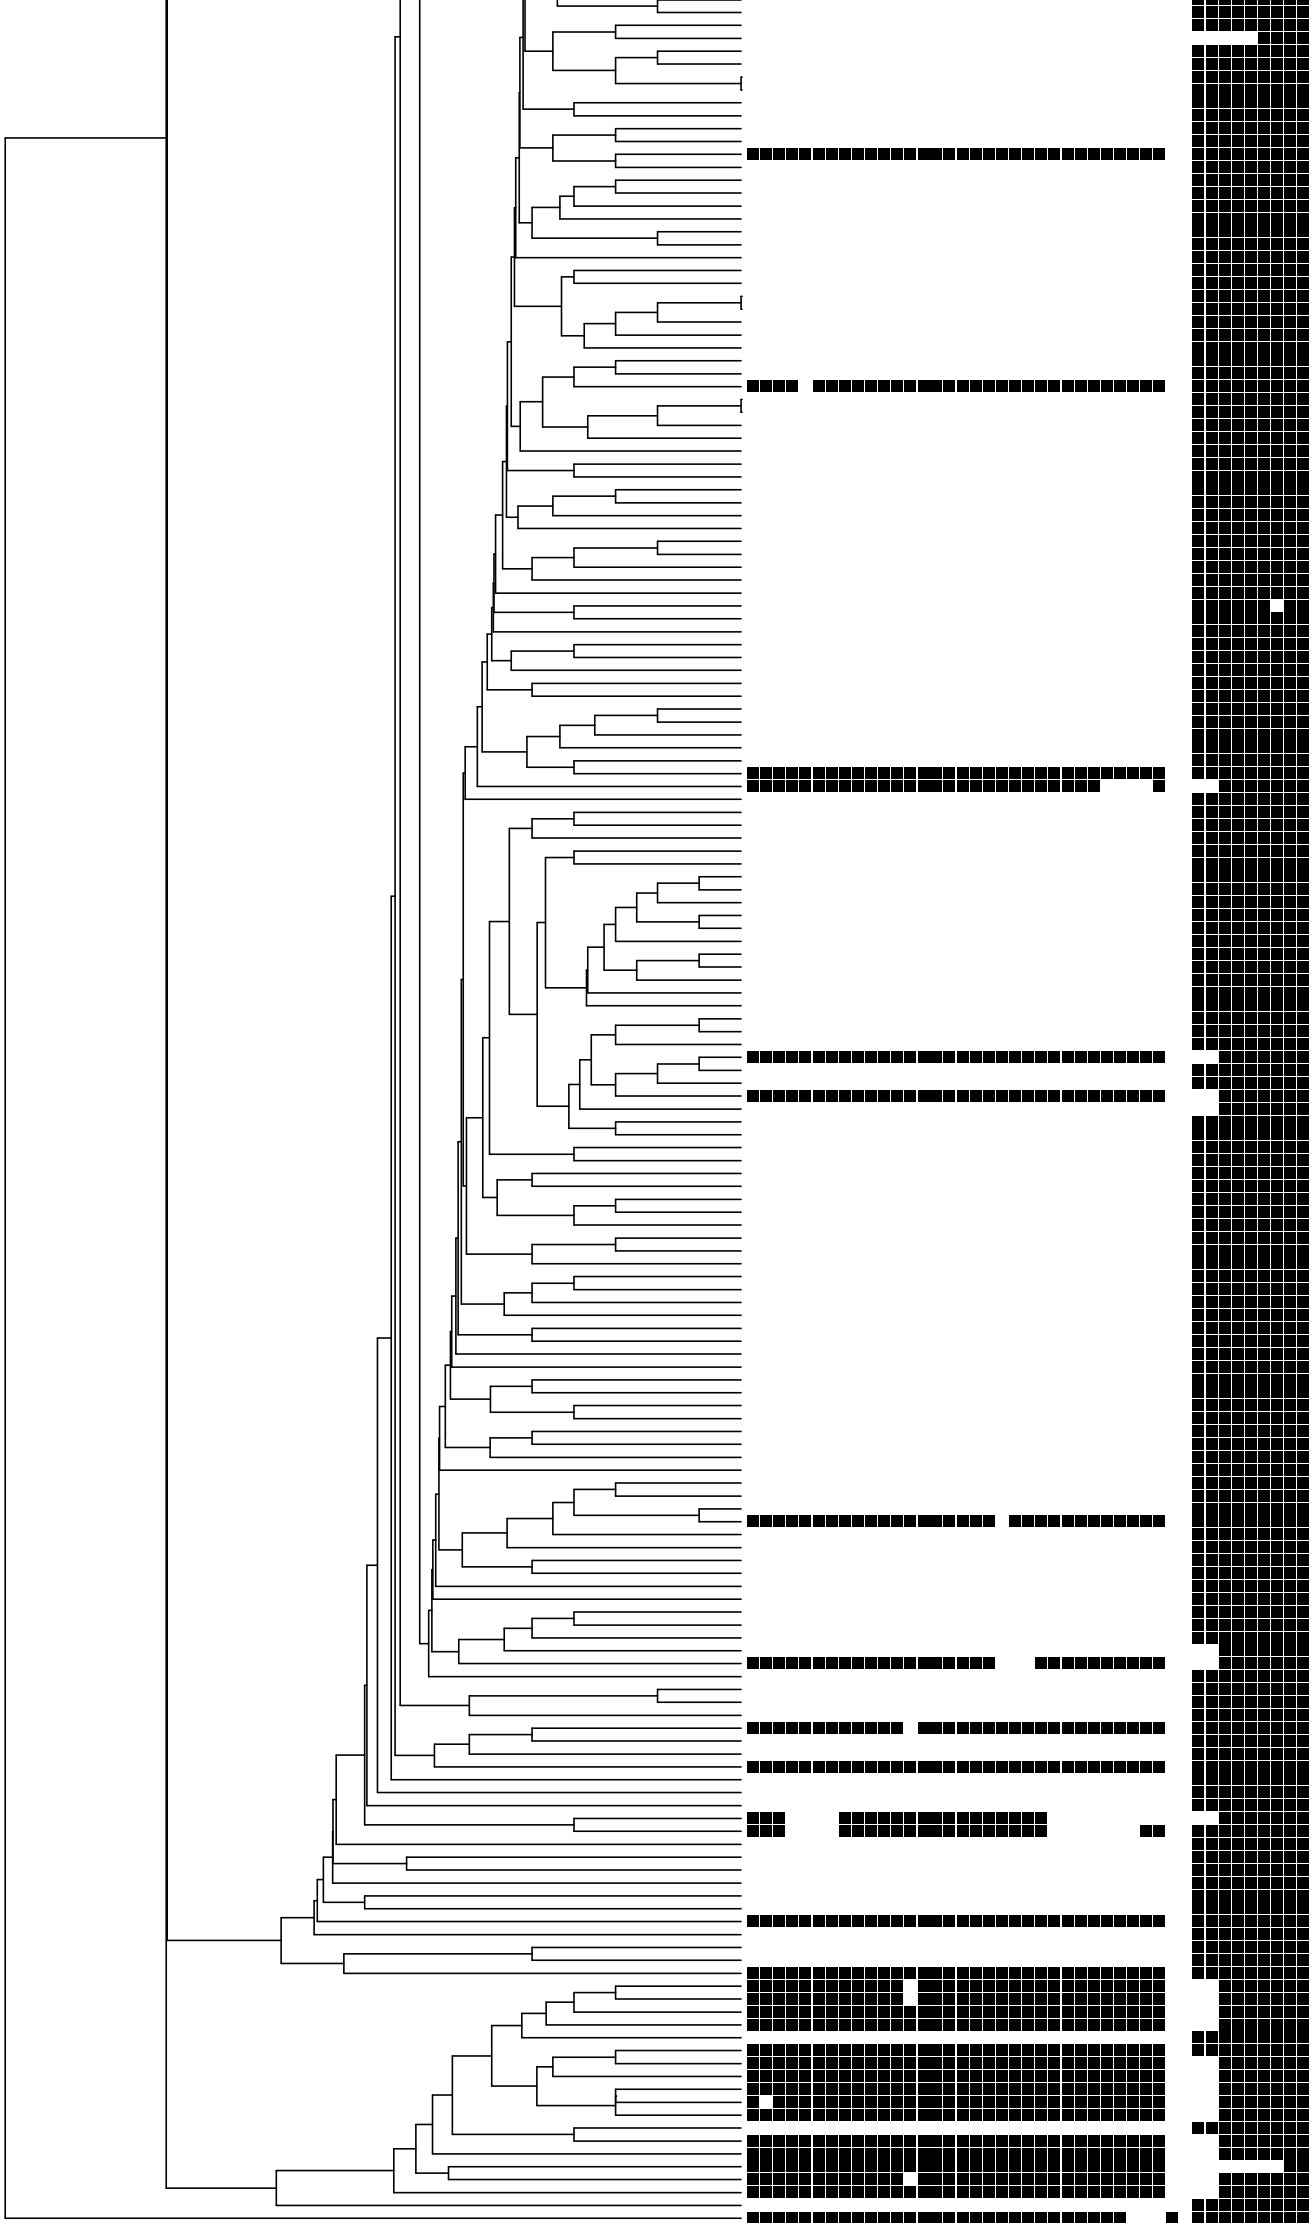

Supplement: 12879_2018_3351_MOESM1_ESM.pdf [file 12879_2018_3351_MOESM1_ESM.pdf]
